# Supplementary material
Source: publisher site journal article supplement (https://www.dovepress.com/article/400735)
Supplement: Supplementary file 1 [file get_supplementary_file.php]

**Supplemental material**

**Table S1** Compared complete blood count of COVID-19 subjects with healthy volunteers

| Characteristic | Control (n=39) | T1 | | *P* value |
| --- | --- | --- | --- | --- |
| Severe (n=11) | non-Severe (n=35) |
| White blood cell count (×109/L) | 5.4 (4.9-6.0) | 4.4 (3.8-8.8) | 5.1 (4.1-6.1) | 0.53 |
| Neutrophil count (×109/L) | 3.1 (2.6-3.5) | 3.5 (2.6-7.0) | 3.3 (2.4-4.4) | 0.162 |
| Lymphocyte count (×109/L) | 1.9 (1.6-2.2) | 0.8 (0.4-0.9) | 1.1 (0.7-1.5) | <0.001 |
| Monocyte count (×109/L) | 0.4 (0.3-0.5) | 0.4 (0.3-0.5) | 0.4 (0.3-0.6) | 0.34 |
| Eosinophil count(×109/L) | 0.11 (0.07-0.16) | 0.00 (0.00-0.00) | 0.01 (0.00-0.03) | <0.001 |
| Basophil count(×109/L) | 0.03 (0.02-0.04) | 0.01 (0.00-0.01) | 0.02 (0.01-0.02) | <0.001 |
| Red blood cell count(×1012/L) | 4.8 (4.7-5.0) | 4.2 (3.9-4.5) | 4.6 (4.2-5.0) | 0.011 |
| Hemoglobin(g/L) | 146 (137-153) | 125 (121-138) | 140 (128-147) | 0.009 |
| Mean corpuscular volume(fL) | 89.8 (88.2-92.23) | 90.3 (88.0-91.0) | 89.7 (87.6-91.3) | 0.662 |
| Red blood cell distribution width (%) | 12.3 (12.1-12.73) | 13.0 (12.4-13.8) | 12.3 (12.1-12.8) | 0.078 |
| Platelet (×109/L) | 222 (195-245) | 161 (151-247) | 205 (166-240) | 0.307 |
| Mean platelet volume (fL) | 10.5 (10.1-10.9) | 10.7 (10.2-11.2) | 10.5 (9.8-11.2) | 0.873 |
| Platelet volume distribution width (%) | 12.3 (11.4-13.2) | 13.1 (11.9-13.6) | 12.2 (11.0-13.7) | 0.755 |
